# Supplementary material
Source: publisher site journal article supplement (https://www.dovepress.com/article/585529)
Supplement: Supplementary file 1 [file 585529_Supplementary%20File_1.docx]

**Supplementary File**

[Supplementary Table 1. Evaluation metrics for assessing the fit of GBTM. 2](#_Toc224582071)

[Supplementary Table 2. Multivariable Cox regression analysis for the association between CAP and the risk of GSD after excluding baseline diseases. 2](#_Toc224582072)

[Supplementary Table 3. Multivariable Cox regression analysis for the association between CAP and the risk of GSD after excluding participants with follow-up time less than 10 months. 3](#_Toc224582073)

[Supplementary Table 4. Multivariable Cox regression analysis of CAP and GSD risk with graded adjustments for TC and LDL-C. 4](#_Toc224582074)

[Supplementary Figure 1 5](#_Toc224582075)

[Supplementary Figure 2 6](#_Toc224582076)

Supplementary Table 1. Evaluation metrics for assessing the fit of GBTM.

| Group | Count | Shape | Avepp | *P*j | Πj | OCC | Ek | ΔBIC |
| --- | --- | --- | --- | --- | --- | --- | --- | --- |
| Group1 | 253 | Linear | 92.6 | 61.4 | 61.1 | 7.9 | 0.71 | -1 |
| Group2 | 159 | Quadratic | 89.0 | 38.6 | 38.9 | 12.7 |

Footnotes: Avepp (Average Posterior Probability), *P*j (Posterior Probability of Group Membership), Πj(Group Membership Probability), OCC (Odds of Correct Classification), Ek: (Classification Entropy Statistic for K Latent Classes), BIC (Bayesian information criterion).

Supplementary Table 2. Multivariable Cox regression analysis for the association between CAP and the risk of GSD after excluding baseline diseases.

| Variables | *β* | Se | HR (95%CI) | *P-*value | C-index |
| --- | --- | --- | --- | --- | --- |
| CAP, per SD, (dB/m) | 0.35 | 0.13 | 1.42 (1.10-1.85) | < 0.01** | 0.66 |
| CAP, categorical, (dB/m) |  |  |  |  | 0.67 |
| Reference group | - | - | - | - |  |
| Mild steatosis group | 0.59 | 0.36 | 1.80 (0.88-3.67) | 0.11 |  |
| Moderate steatosis group | 0.91 | 0.34 | 2.50 (1.29-4.85) | < 0.01** |  |
| Severe steatosis group | 0.92 | 0.36 | 2.50 (1.25-5.02) | < 0.01** |  |

Footnotes: SD (standard deviation), ** *P* < 0.01.

Supplementary Table 3. Multivariable Cox regression analysis for the association between CAP and the risk of GSD after excluding participants with follow-up time less than 10 months.

| Variables | *β* | Se | HR (95%CI) | *P-*value | C-index |
| --- | --- | --- | --- | --- | --- |
| CAP, per SD, (dB/m) | 0.35 | 0.13 | 1.42 (1.09-1.85) | < 0.01** | 0.66 |
| CAP, categorical, (dB/m) |  |  |  |  | 0.67 |
| Reference group | - | - | - | - |  |
| Mild steatosis group | 0.53 | 0.37 | 1.70 (0.82-3.53) | 0.16 |  |
| Moderate steatosis group | 0.96 | 0.34 | 2.60 (1.34-5.07) | < 0.01** |  |
| Severe steatosis group | 0.90 | 0.36 | 2.46 (1.22-4.98) | 0.01* |  |

Footnotes: SD (standard deviation), * *P* < 0.05, ** *P* < 0.01.

Supplementary Table 4. Multivariable Cox regression analysis of CAP and GSD risk with graded adjustments for TC and LDL-C.

| Variables | *β* | Se | HR (95%CI) | *P-*value | C-index |
| --- | --- | --- | --- | --- | --- |
| With TC only | | | | | |
| CAP, per SD, (dB/m) | 0.34 | 0.13 | 1.41 (1.09-1.82) | < 0.01** | 0.66 |
| CAP, categorical, (dB/m) |  |  |  |  | 0.67 |
| Reference group | - | - | - | - |  |
| Mild steatosis group | 0.58 | 0.36 | 1.79 (0.88-3.64) | 0.11 |  |
| Moderate steatosis group | 0.93 | 0.33 | 2.55 (1.32-4.92) | < 0.01** |  |
| Severe steatosis group | 0.91 | 0.35 | 2.48 (1.24-4.96) | 0.01* |  |
| With LDL-C only | | | | | |
| CAP, per SD, (dB/m) | 0.34 | 0.13 | 1.41 (1.09-1.82) | < 0.01** | 0.66 |
| CAP, categorical, (dB/m) |  |  |  |  | 0.67 |
| Reference group | - | - | - | - |  |
| Mild steatosis group | 0.59 | 0.36 | 1.80 (0.88-3.66) | 0.11 |  |
| Moderate steatosis group | 0.94 | 0.34 | 2.57 (1.33-4.97) | < 0.01** |  |
| Severe steatosis group | 0.92 | 0.35 | 2.50 (1.25-4.99) | < 0.01** |  |

Footnotes: SD (standard deviation), TC (total cholesterol), LDL-C (low-density lipoprotein cholesterol), * *P* < 0.05, ** *P* < 0.01.

Supplementary Figure 1


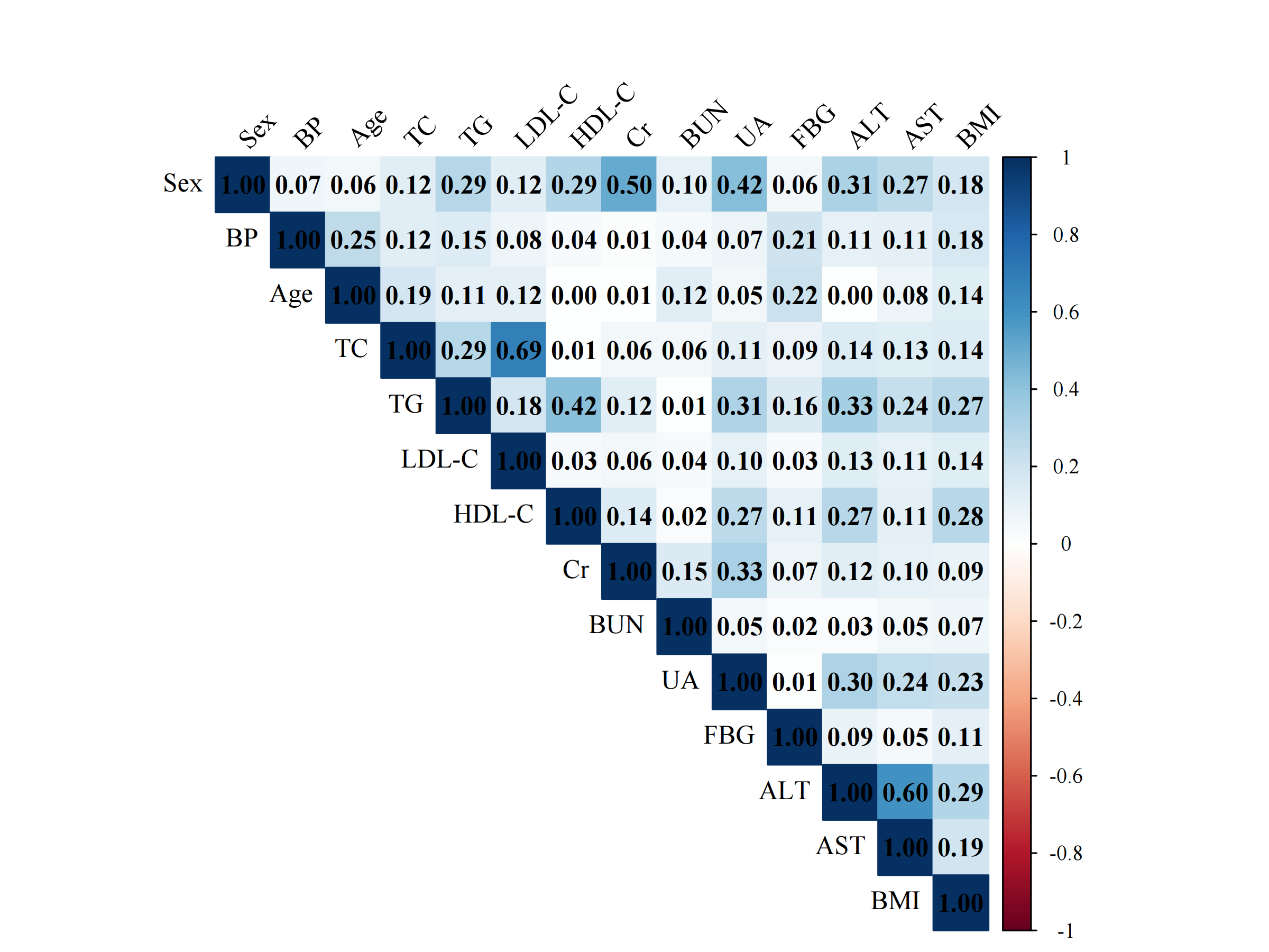


Supplementary Figure 1. Autocorrelation coefficient of covariates.

Supplementary Figure 2


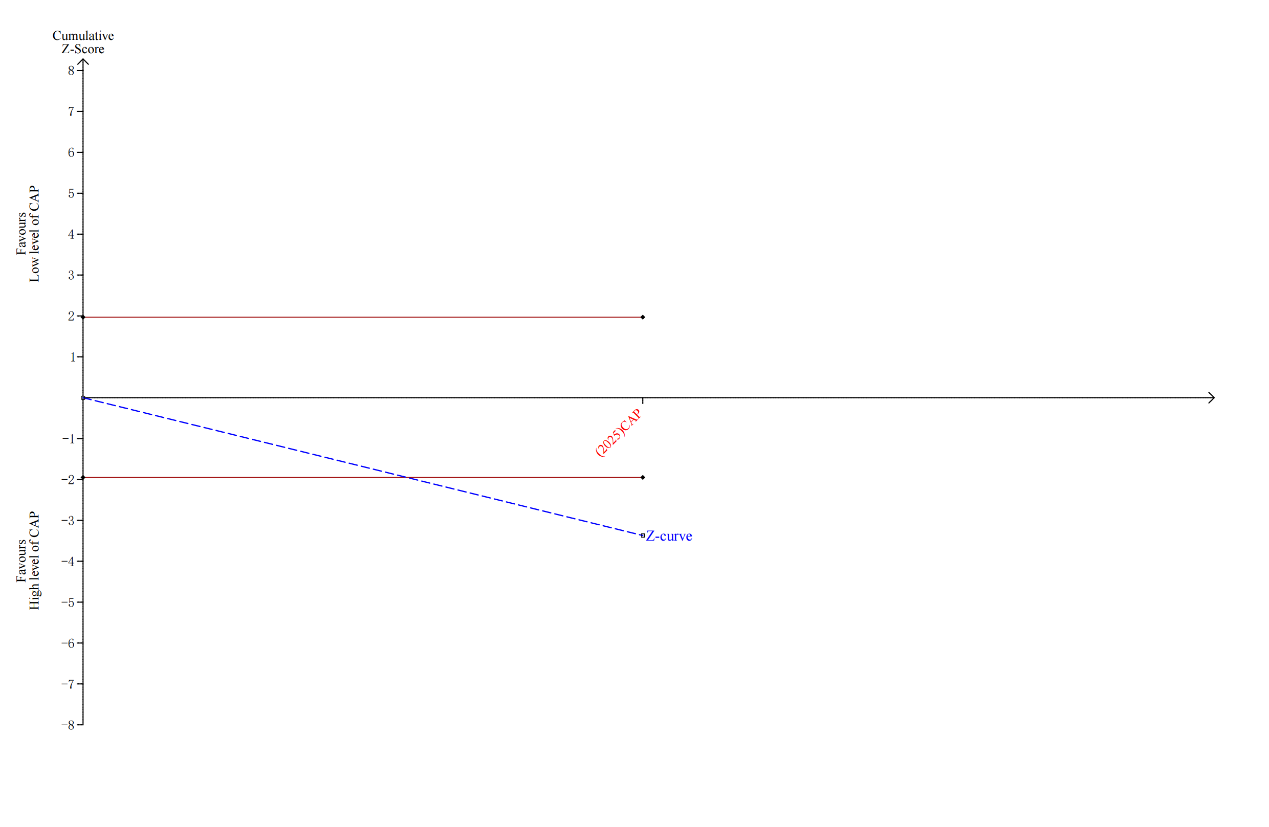


Supplementary Figure 2. The TSA graph evaluates the reliability of the findings by assessing whether the cumulative evidence reaches sufficient statistical power, accounting for multiple testing and potential random errors.
